# Supplementary material for: A 16S Next Generation Sequencing Based Molecular and Bioinformatics Pipeline to Identify Processed Meat Products Contamination and Mislabelling
Source: MDPI journal article supplement (doi:10.3390/ani12040416), 2022-02-10
Supplement: s1 [file s1]

## Supplementary Tables

**Table S1.** Percentage average fold of pure DNA from known meat types.

| Known Meat type (100%) | Genus (% Of Average Fold)                                                                                                                                                                          | Percentage deviation |
|------------------------|----------------------------------------------------------------------------------------------------------------------------------------------------------------------------------------------------|----------------------|
| Beef                   | <i>Bos</i> (Cattle) (99), <i>Bubalus</i> (Buffalo) (0,4), <i>Struthio</i> (Ostrich) (0,2) & <i>Rupicapra</i> (Goat antelope) (0,4)                                                                 | 1                    |
| Mutton                 | <i>Ovis</i> (Sheep) (99,1), <i>Bos</i> (Cattle) (0,1), <i>Rupicapra</i> (Goat Antelope) (0,6), <i>Naemorhedus</i> (Goral) (0,1) & <i>Anas</i> (Duck) (0,1)                                         | 0.9                  |
| Pork                   | <i>Sus</i> (Pig) (99,7), <i>Ovis</i> (Sheep) (0,2), & <i>Bos</i> (Cattle) (0,1)                                                                                                                    | 0.3                  |
| Chevon                 | <i>Capra</i> (Goat) (98,7), <i>Ovis</i> (Sheep) (0,2), <i>Budorcas</i> (Gnu Goat), <i>Bos</i> (Cattle) (0,4), <i>Rupicapra</i> (Goat Antelope) (0,2), & <i>Sus</i> (Pig) (0,1)                     | 1.3                  |
| Chicken                | <i>Gallus</i> (Chicken) (98,5), <i>Bos</i> (Beef) (0,3), <i>Sus</i> (Pig) (0,2), <i>Capra</i> (Goat) (0,6), & <i>Ovis</i> (Sheep) (0,3)                                                            | 1.4                  |
| Duck                   | <i>Anas</i> (Duck) (98,5), <i>Capra</i> (Goat) (0,1), <i>Ovis</i> (Sheep) (0,5), <i>Gallus</i> (Chicken) (0,2), <i>Bos</i> (Beef) (0,1), <i>Meleagris</i> (Turkey) (0,3), & <i>Sus</i> (Pig) (0,2) | 1.5                  |
| Turkey                 | <i>Meleagris</i> (Turkey) (99,1), <i>Sus</i> (Pig) (0,1), <i>Anas</i> (Duck) (0,2), <i>Capra</i> (Goat) (0,2), <i>Ovis</i> (Sheep) (0,1), <i>Gallus</i> (Chicken) (0,1), & <i>Bos</i> (Beef) (0,1) | 0.9                  |
| Ostrich                | <i>Struthio</i> (Ostrich) (99,3), <i>Bos</i> (Beef) (0,3), <i>Meleagris</i> (Turkey) (0,1), <i>Sus</i> (Pig) (0,1), <i>Anas</i> (Duck) (0,1), & <i>Ovis</i> (Sheep) (0,1)                          | 0.7                  |
| Kangaroo               | <i>Macropus</i> (Kangaroo) (99,4), <i>Capra</i> (Goat) (0,2), <i>Struthio</i> (Ostrich) (0,2), <i>Bos</i> (Cattle) (0,1), & <i>Anas</i> (Duck) (0,1)                                               | 0.6                  |

**Table S2.** Percentage of average fold of pure DNA from two known meat types artificially mixed at a ratio of 1:1

| Mixture Ratio | Meat Type (%)                 | Genus (% Of Average fold)                                                                                                                                                                     | Percentage Difference with Respect to Input Ratio |
|---------------|-------------------------------|-----------------------------------------------------------------------------------------------------------------------------------------------------------------------------------------------|---------------------------------------------------|
| 1:1           | Pork (50%)<br>Beef (50%)      | <i>Sus</i> (Pig) (51,5)<br><i>Bos</i> (Cattle) (48,1)<br><i>Ovis</i> (Sheep) (0,1)<br><i>Bubalus</i> (Buffalo) (0,1)<br><i>Rupicapra</i> (Goat Antelope) (0,1)                                | 1,5<br>-1,9                                       |
| 1:1           | Chevon (50%)<br>Mutton (50%)  | <i>Capra</i> (Goat) (35,7)<br><i>Ovis</i> (Sheep) (63,4)<br><i>Budorcas</i> (Gnu Goat) (0,1)<br><i>Bos</i> (Cattle) (0,4)<br><i>Rupicapra</i> (Goat Antelope) (0,3)<br><i>Sus</i> (Pig) (0,1) | -14,3<br>13,4                                     |
| 1:1           | Chicken (50%)<br>Turkey (50%) | <i>Gallus</i> (Chicken) (45,3)<br><i>Meleagris</i> (Turkey) (50,8)<br><i>Bos</i> (Cattle) (0,2)<br><i>Sus</i> (Pig) (0,1)                                                                     | -4,7<br>0,8                                       |

|     |                              |                                                                                                                                                                                                                                    |               |
|-----|------------------------------|------------------------------------------------------------------------------------------------------------------------------------------------------------------------------------------------------------------------------------|---------------|
|     |                              | <i>Capra</i> (Goat) (0,3)<br><i>Ovis</i> (Sheep) (0,2)                                                                                                                                                                             |               |
| 1:1 | Duck (50%)<br>Ostrich (50%)  | <i>Anas</i> (Duck) (69,2)<br><i>Struthio</i> (Ostrich) (29,9)<br><i>Sus</i> (Pig) (0,2)<br><i>Capra</i> (Goat) (0,1)<br><i>Ovis</i> (Sheep) (0,2)<br><i>Gallus</i> (Chicken) (0,1)<br><i>Bos</i> (Cattle) (0,3)                    | 19,2<br>-20,1 |
| 1:1 | Beef (50%)<br>Kangaroo (50%) | <i>Bos</i> (Cattle) (73,9)<br><i>Macropus</i> (Kangaroo) (25,1)<br><i>Bubalus</i> (Buffalo) (0,2)<br><i>Gallus</i> (Chicken) (0,1)<br><i>Rupicapra</i> (Goat Antelope) (0,2)<br><i>Sus</i> (Pig) (0,2)<br><i>Anas</i> (Duck) (0,1) | 23,9<br>24,9  |

**Table S3.** Percentage average folds of pure DNA from known meat samples artificially mixed at a ratio of 9:1.

| Mixture Ratio | Meat Type (%)                | Genus (% Of Average Fold)                                                                                                                                           | % Difference with Respect to Input Ratio |
|---------------|------------------------------|---------------------------------------------------------------------------------------------------------------------------------------------------------------------|------------------------------------------|
| 9:1           | Pork (90%)<br>Beef (10%)     | <i>Sus</i> (Pig) (91,3)<br><i>Bos</i> (Cattle) (8,5)<br><i>Ovis</i> (Sheep) (0,1)                                                                                   | 1,3<br>-1,5                              |
| 9:1           | Beef (90%)<br>Pork (10%)     | <i>Bos</i> (Cattle) (92,7)<br><i>Sus</i> (Pig) (6,6)<br><i>Bubalus</i> (Buffalo) (0,3)<br><i>Rupicapra</i> (Goat Antelope) (0,3)                                    | 2,7<br>-3,4                              |
| 9:1           | Chevon (90%)<br>Mutton (10%) | <i>Capra</i> (Goat) (81,5)<br><i>Ovis</i> (Sheep) (17,4)<br><i>Budorcas</i> (Gnu Goat) (0,3)<br><i>Bos</i> (Cattle) (0,1)<br><i>Rupicapra</i> (Goat Antelope) (0,2) | -8,5<br>7,4                              |
|               | Mutton (90%)<br>Chevon (10%) | <i>Ovis</i> (Sheep) (92,7)<br><i>Capra</i> (Goat) (6,4)<br><i>Rupicapra</i> (Goat Antelope) (0,5)<br><i>Naemorhedus</i> (Goral) (0,1)                               | 2,7<br>-3,6                              |
| 9:1           | Chicken (90%)<br>Duck (10%)  | <i>Gallus</i> (Chicken) (82,1)<br><i>Anas</i> (Duck) (17,5)<br><i>Capra</i> (Goat) (0,1)                                                                            | -7,9<br>7,5                              |

|     |                             |                                                                                                                                                   |             |
|-----|-----------------------------|---------------------------------------------------------------------------------------------------------------------------------------------------|-------------|
|     |                             | <i>Ovis</i> (Sheep) (0,1)<br><i>Sus</i> (Pig) (0,1)<br><i>Bos</i> (Cattle) (0,1)                                                                  |             |
| 9:1 | Duck (90%)<br>Chicken (10%) | <i>Anas</i> (Duck) (96,3)<br><i>Gallus</i> (Chicken) (3,4)<br><i>Sus</i> (Pig) (0,1)                                                              | 6,3<br>-3,6 |
| 9:1 | Ostrich (90%)<br>Duck (10%) | <i>Struthio</i> (Ostrich) (81,2)<br><i>Anas</i> (Duck) (18,5)<br><i>Bos</i> (Cattle) (0,1)                                                        | -8,8<br>8,5 |
| 9:1 | Duck (90%)<br>Ostrich (10%) | <i>Anas</i> (Duck) (86,4)<br><i>Struthio</i> (Ostrich) (13,2)<br><i>Ovis</i> (Sheep) (0,1)<br><i>Sus</i> (Pig) (0,1)<br><i>Bos</i> (Cattle) (0,1) | -3,6<br>3,2 |

**Table S4.** Percentage average fold of DNA from retail biltong for which the meat types were not indicated on product labels (N=11).

| Sample Number | Genus (% Of Average fold)                                                                                                                                                                                                             |
|---------------|---------------------------------------------------------------------------------------------------------------------------------------------------------------------------------------------------------------------------------------|
| S19           | <i>Bos</i> (Cattle) (98,1), <i>Bubalus</i> (Buffalo) (0,6), <i>Rupicapra</i> (Goat Antelope) (0,8), <i>Redunca</i> (Reedbuck) (0,2) and <i>Bison</i> (Bison) (0,1)                                                                    |
| S35           | <i>Bos</i> (Cattle) (99,7), & <i>Bubalus</i> (Buffalo) (0,1)                                                                                                                                                                          |
| S3            | <i>Bos</i> (Cattle) (98,3), <i>Bubalus</i> (Buffalo) (0,7), <i>Rupicapra</i> (Goat Antelope) (0,7), <i>Redunca</i> (Reedbuck) (0,2) and <i>Bison</i> (Bison) (0,1)                                                                    |
| S45           | <i>Bos</i> (Cattle) (99,4), <i>Bubalus</i> (Buffalo) (0,2), <i>Rupicapra</i> (Goat Antelope) (0,1), <i>Sus</i> (Pig) (0,1) and <i>Redunca</i> (Reedbuck) (0,1)                                                                        |
| S54           | <i>Bos</i> (Cattle) (98,2), <i>Bubalus</i> (Buffalo) (0,7), <i>Redunca</i> (Reedbuck) (0,3), <i>Sus</i> (Pig) (0,2), <i>Hemitragus</i> (Tahr) (0,2), <i>Capricornis</i> (Serow) (0,1) and <i>Bison</i> (Bison) (0,1)                  |
| S56           | <i>Bos</i> (Cattle) (99,4), <i>Bubalus</i> (Buffalo) (0,2), <i>Rupicapra</i> (Goat Antelope) (0,1), <i>Sus</i> (Pig) (0,1) and <i>Redunca</i> (Reedbuck) (0,1)                                                                        |
| S62           | <i>Bos</i> (Cattle) (98,2), <i>Rupicapra</i> (Goat Antelope) (0,6), <i>Bubalus</i> (Buffalo) (0,5), <i>Redunca</i> (Reedbuck) (0,2), <i>Capricornis</i> (Serow) (0,1), <i>Bison</i> (Bison) (0,1), and <i>Hemitragus</i> (Tahr) (0,1) |
| S67           | <i>Bos</i> (cattle) (98,7), <i>Bubalus</i> (Buffalo) (0,5), <i>Rupicapra</i> (Goat Antelope) (0,4), <i>Redunca</i> (Reedbuck) (0,2) and <i>Bison</i> (Bison) (0,1)                                                                    |
| S69           | <i>Bos</i> (Cattle) (99,4), <i>Bubalus</i> (Buffalo) (0,2), <i>Bison</i> (Bison) (0,1), <i>Rupicapra</i> (Goat Antelope) (0,2) and <i>Redunca</i> (Reedbuck) (0,1),                                                                   |
| S92           | <i>Bos</i> (Cattle) (xx) (98,4), <i>Rupicapra</i> (Goat Antelope) (0,7), <i>Bubalus</i> (Buffalo) (0,5) and <i>Redunca</i> (Reedbuck) (0,2)                                                                                           |
| S09           | <i>Bos</i> (Cattle) (99,2), <i>Bubalus</i> (Buffalo) (0,3), <i>Rupicapra</i> (Goat Antelope) (0,2) <i>Sus</i> (Pig) (0,1) and <i>Redunca</i> (Reedbuck) (0,1)                                                                         |

**Table S5.** Percentage average fold of DNA from retail meat products labelled as beef biltong (N=17)

| Sample Number  | Genus (% Of Average Fold)                                                                                                                                                                                            |
|----------------|----------------------------------------------------------------------------------------------------------------------------------------------------------------------------------------------------------------------|
| S <sup>®</sup> | <i>Bos</i> (Cattle) (93,6), <i>Ovis</i> (Sheep) (4,9), <i>Sus</i> (Pig) (0,8), <i>Bubalus</i> (Buffalo) (0,2) <i>Bison</i> (Bison) (0,1), <i>Rupicapra</i> (Goat Antelope) (0,1) and <i>Redunca</i> (Reedbuck) (0,1) |
| 112            | <i>Bos</i> (Cattle) (98,4), <i>Bubalus</i> (Buffalo) (0,6), <i>Rupicapra</i> (Goat Antelope) (0,6), <i>Redunca</i> (Reedbuck) (0,2), <i>Bison</i> (Bison) (0,1) and <i>Ovis</i> (Sheep) (0,1)                        |

|                  |                                                                                                                                                                                                                                                                                                |
|------------------|------------------------------------------------------------------------------------------------------------------------------------------------------------------------------------------------------------------------------------------------------------------------------------------------|
| 117 <sup>®</sup> | <i>Bos</i> (Cattle) (97,9), <i>Bubalus</i> (Buffalo) (0,7), <i>Hemitragus</i> (Tahr) (0,3), <i>Capricornis</i> (Serow) (0,2), <i>Redunca</i> (Reedbuck) (0,2), <i>Moschus</i> (Musk-deer) (0,1), <i>Sus</i> (Pig) (0,1), <i>Bison</i> (Bison) (0,1) and <i>Rupicapra</i> (Goat Antelope) (0,1) |
| 137              | <i>Bos</i> (Cattle) (99,0), <i>Bubalus</i> (Buffalo) (0,4), <i>Rupicapra</i> (Goat Antelope) (0,2), <i>Redunca</i> (Reedbuck) (0,2), <i>Sus</i> (Pig) (0,1) and <i>Bison</i> (Bison) (0,1)                                                                                                     |
| 138              | <i>Bos</i> (Cattle) (99,0), <i>Bubalus</i> (Buffalo) (0,4), <i>Rupicapra</i> (Goat Antelope) (0,3), <i>Redunca</i> (Reedbuck) (0,2), <i>Sus</i> (Pig) (0,1) and <i>Bison</i> (Bison) (0,1)                                                                                                     |
| 142              | <i>Bos</i> (Cattle) (99,5), <i>Bubalus</i> (Buffalo) (0,2), <i>Bison</i> (Bison) (0,1) and <i>Redunca</i> (Reedbuck) (0,1)                                                                                                                                                                     |
| 147              | <i>Bos</i> (Cattle) (99,2), <i>Sus</i> (Pig) (0,2), <i>Bubalus</i> (Buffalo) (0,2), <i>Ovis</i> (Sheep) (0,1), <i>Rupicapra</i> (Goat Antelope) (0,1) and <i>Redunca</i> (Reedbuck) (0,1)                                                                                                      |
| 148              | <i>Bos</i> (Cattle) (99,0), <i>Bubalus</i> (Buffalo) (0,5), <i>Redunca</i> (Reedbuck) (0,2), <i>Sus</i> (Pig) (0,1) and <i>Hemitragus</i> (Tahr) (0,1)                                                                                                                                         |
| 149              | <i>Bos</i> (Cattle) (99,4), <i>Bubalus</i> (Buffalo) (0,3), <i>Ovis</i> (Sheep) (0,1) and <i>Redunca</i> (Reedbuck) (0,1)                                                                                                                                                                      |
| 15               | <i>Bos</i> (Cattle) (99,4), <i>Sus</i> (Pig) (0,1), <i>Bubalus</i> (Buffalo) (0,1), <i>Rupicapra</i> (Goat Antelope) (0,1) and <i>Redunca</i> (Reedbuck) (0,1)                                                                                                                                 |
| 153              | <i>Bos</i> (Cattle) (99,6), <i>Sus</i> (Pig) (0,2) and <i>Bubalus</i> (Buffalo) (0,1)                                                                                                                                                                                                          |
| 16 <sup>®</sup>  | <i>Bos</i> (Cattle) (57,5), <i>Sus</i> (Pig) (37,4), <i>Ovis</i> (Sheep) (4,6), <i>Bubalus</i> (Buffalo) (0,1) and <i>Rupicapra</i> (Goat Antelope) (0,1)                                                                                                                                      |
| 166              | <i>Bos</i> (Cattle) (99,3), <i>Bubalus</i> (Buffalo) (0,2), <i>Rupicapra</i> (Goat Antelope) (0,2) and <i>Redunca</i> (Reedbuck) (0,1)                                                                                                                                                         |
| 168              | <i>Bos</i> (Cattle) (98,6), <i>Bubalus</i> (Buffalo) (0,6), <i>Rupicapra</i> (Goat Antelope) (0,4), <i>Redunca</i> (Reedbuck) (0,2) and <i>Bison</i> (Bison) (0,1)                                                                                                                             |
| 17               | <i>Bos</i> (Cattle) (99,2), <i>Bubalus</i> (Buffalo) (0,4), <i>Rupicapra</i> (Goat Antelope) (0,2) and <i>Redunca</i> (Reedbuck) (0,1)                                                                                                                                                         |
| 175              | <i>Bos</i> (Cattle) (99,5), <i>Bubalus</i> (Buffalo) (0,3), <i>Sus</i> (Pig) (0,1) and <i>Redunca</i> (Reedbuck) (0,1)                                                                                                                                                                         |
| 19               | <i>Bos</i> (Cattle) (99,1), <i>Bubalus</i> (Buffalo) (0,4), <i>Rupicapra</i> (Goat Antelope) (0,2), <i>Bison</i> (Bison) (0,1) and <i>Redunca</i> (Reedbuck) (0,1)                                                                                                                             |

**Table S6.** Percentage average folds of DNA from retail minced meat for which the meat types were not indicated on product labels (N=27).

| Sample Number   | Genus (% Of Average fold)                                                                                                                                         |
|-----------------|-------------------------------------------------------------------------------------------------------------------------------------------------------------------|
| S               | <i>Bos</i> (Cattle) (99,7), <i>Bubalus</i> (Buffalo) (0,1) and <i>Rupicapra</i> (Goat Antelope) (0,1)                                                             |
| 16              | <i>Bos</i> (Cattle) (99,0), <i>Sus</i> (Pig) (0,6), <i>Bubalus</i> (Buffalo) (0,1) and <i>Rupicapra</i> (Goat Antelope) (0,1)                                     |
| 2               | <i>Bos</i> (Cattle) (99,4), <i>Bubalus</i> (Buffalo) (0,3), <i>Bison</i> (Bison) (0,1) and <i>Redunca</i> (Reedbuck) (0,1)                                        |
| 23              | <i>Bos</i> (Cattle) (99,4), <i>Bubalus</i> (Buffalo) (0,3), <i>Bison</i> (Bison) (0,1) and <i>Redunca</i> (Reedbuck) (0,1)                                        |
| 3               | <i>Bos</i> (Cattle) (99,2), <i>Rupicapra</i> (Goat Antelope) (0,2), <i>Sus</i> (Pig) (0,1), <i>Ovis</i> (Sheep) (0,1) and <i>Redunca</i> (Reedbuck) (0,1)         |
| 33              | <i>Bos</i> (Cattle) (99,5), <i>Bubalus</i> (Buffalo) (0,2), <i>Rupicapra</i> (Goat Antelope) (0,2) and <i>Redunca</i> (Reedbuck) (0,1)                            |
| 34 <sup>®</sup> | <i>Bos</i> (Cattle) (97,7), <i>Ovis</i> (Sheep) (1,8), <i>Bubalus</i> (Buffalo) (0,2), <i>Rupicapra</i> (Goat Antelope) (0,1) and <i>Redunca</i> (Reedbuck) (0,1) |
| 39              | <i>Bos</i> (Cattle) (99,3), <i>Rupicapra</i> (0,3), <i>Bubalus</i> (0,2) and <i>Sus</i> (Pig) (0,1)                                                               |
| 4 <sup>®</sup>  | <i>Sus</i> (Pig) (97,7) and <i>Bos</i> (Cattle) (2,2)                                                                                                             |
| 5               | <i>Bos</i> (Cattle) (99,7) and <i>Bubalus</i> (Buffalo) (0,1)                                                                                                     |
| 55              | <i>Bos</i> (Cattle) (99,4), <i>Bubalus</i> (Buffalo) (0,2), <i>Rupicapra</i> (Goat Antelope) (0,1) and <i>Redunca</i> (Reedbuck) (0,1)                            |
| 58              | <i>Bos</i> (Cattle) (98,2), <i>Bubalus</i> (Buffalo) (0,8), <i>Rupicapra</i> (Goat Antelope) (0,5) and <i>Redunca</i> (Reedbuck) (0,3)                            |
| 59              | <i>Bos</i> (Cattle) (99,7) and <i>Bubalus</i> (Buffalo) (0,1)                                                                                                     |

|                 |                                                                                                                                                                                             |
|-----------------|---------------------------------------------------------------------------------------------------------------------------------------------------------------------------------------------|
| 6               | <i>Bos</i> (Cattle) (98,8), <i>Sus</i> (Pig) (0,5), <i>Bubalus</i> (Buffalo) (0,2), <i>Rupicapra</i> (Goat Antelope) (0,3), <i>Ovis</i> (Sheep) (0,1) and <i>Redunca</i> (Reedbuck) (0,1)   |
| 63              | <i>Bos</i> (Cattle) (99,6), <i>Bubalus</i> (Buffalo) (0,1) and <i>Rupicapra</i> (Goat Antelope) (0,1)                                                                                       |
| 65 <sup>©</sup> | <i>Bos</i> (Cattle) (83,2), <i>Ovis</i> (Sheep) (16,4), <i>Rupicapra</i> (0,2) and <i>Bubalus</i> (Buffalo) (0,1)                                                                           |
| 66              | <i>Bos</i> (Cattle) (99,3), <i>Bubalus</i> (Buffalo) (0,2), <i>Rupicapra</i> (Goat Antelope) (0,1), <i>Ovis</i> (Sheep) (0,1) and <i>Redunca</i> (Reedbuck) (0,1)                           |
| 74              | <i>Bos</i> (Cattle) (98,3), <i>Sus</i> (Pig) (1,3), <i>Bubalus</i> (Buffalo) (0,2), <i>Rupicapra</i> (Goat Antelope) (0,1) and <i>Redunca</i> (Reedbuck) (0,1)                              |
| 77              | <i>Bos</i> (Cattle) (99,0), <i>Bubalus</i> (Buffalo) (0,3), <i>Rupicapra</i> (Goat Antelope) (0,3), <i>Bison</i> (Bison) (0,1) and <i>Redunca</i> (Reedbuck) (0,1)                          |
| 78 <sup>©</sup> | <i>Bos</i> (Cattle) (95,3), <i>Sus</i> (Pig) (3,8), <i>Bubalus</i> (Buffalo) (0,2), (Goat Antelope) (0,3), <i>Bison</i> (Bison) (0,1), <i>Rupicapra</i> and <i>Redunca</i> (Reedbuck) (0,1) |
| 8               | <i>Bos</i> (Cattle) (99,6), <i>Bubalus</i> (Buffalo) (0,1) and <i>Rupicapra</i> (Goat Antelope) (0,1)                                                                                       |
| 89              | <i>Bos</i> (Cattle) (98,8), <i>Ovis</i> (Sheep) (0,4), <i>Sus</i> (Pig) (0,2), <i>Bubalus</i> (Buffalo) (0,2), <i>Rupicapra</i> (Goat Antelope) (0,2) and <i>Redunca</i> (Reedbuck) (0,1)   |
| 9               | <i>Bos</i> (Cattle) (99,4), <i>Bubalus</i> (Buffalo) (0,2), <i>Rupicapra</i> (Goat Antelope) (0,2), <i>Sus</i> (Pig) (0,1) and <i>Redunca</i> (Reedbuck) (0,1)                              |
| 93              | <i>Bos</i> (Cattle) (99,5), <i>Bubalus</i> (Buffalo) (0,2), <i>Rupicapra</i> (Goat Antelope) (0,1) and <i>Redunca</i> (Reedbuck) (0,1)                                                      |
| 94              | <i>Bos</i> (Cattle) (99,8) and <i>Bubalus</i> (Buffalo) (0,1)                                                                                                                               |
| 95              | <i>Bos</i> (Cattle) (99,3), <i>Bubalus</i> (Buffalo) (0,2), <i>Bison</i> (Bison) (0,1), <i>Rupicapra</i> (Goat Antelope) (0,2) and <i>Redunca</i> (Reedbuck) (0,1)                          |
| 97              | <i>Bos</i> (Cattle) (99,5), <i>Bubalus</i> (Buffalo) (0,1), <i>Rupicapra</i> (Goat Antelope) (0,2), <i>Sus</i> (Pig) (0,1) and <i>Redunca</i> (Reedbuck) (0,1)                              |

**Table S7.** Percentage average fold of DNA from retail meat products labelled as beef mince.

| Sample Number | Genus (% Of Average Fold)                                                                                                                                                                     |
|---------------|-----------------------------------------------------------------------------------------------------------------------------------------------------------------------------------------------|
| S             | <i>Bos</i> (Cattle) (99,5), <i>Bubalus</i> (Buffalo) (0,2), <i>Rupicapra</i> (Goat Antelope) (0,1) and <i>Redunca</i> (Reedbuck) (0,1)                                                        |
| 109           | <i>Bos</i> (Cattle) (98,9), <i>Bubalus</i> (Buffalo) (0,7), <i>Redunca</i> (Reedbuck) (0,3) and <i>Bison</i> (Bison) (0,1)                                                                    |
| 12            | <i>Bos</i> (Cattle) (99,3), <i>Bubalus</i> (Buffalo) (0,3), <i>Rupicapra</i> (Goat Antelope) (0,2) and <i>Redunca</i> (Reedbuck) (0,1)                                                        |
| 123           | <i>Bos</i> (Cattle) (99,3), <i>Bubalus</i> (Buffalo) (0,2), <i>Sus</i> (Pig) (0,2), <i>Ovis</i> (Sheep) (0,1), <i>Rupicapra</i> (Goat Antelope) (0,1) and <i>Redunca</i> (Reedbuck) (0,1)     |
| 128           | <i>Bos</i> (Cattle) (99,2), <i>Bubalus</i> (Buffalo) (0,3), <i>Rupicapra</i> (Goat Antelope) (0,2) and <i>Redunca</i> (Reedbuck) (0,1)                                                        |
| 13            | <i>Bos</i> (Cattle) (99,2), <i>Bubalus</i> (Buffalo) (0,2), <i>Sus</i> (Pig) (0,1), <i>Bison</i> (Bison) (0,1) and <i>Rupicapra</i> (Goat Antelope) (0,1)                                     |
| 132           | <i>Bos</i> (Cattle) (99,6), <i>Sus</i> (Pig) (0,1), <i>Bubalus</i> (Buffalo) (0,1), <i>Rupicapra</i> (Goat Antelope) (0,1) and <i>Redunca</i> (Reedbuck) (0,1)                                |
| 133           | <i>Bos</i> (Cattle) (99,1), <i>Bubalus</i> (Buffalo) (0,2), <i>Sus</i> (Pig) (0,2), <i>Rupicapra</i> (Goat Antelope) (0,1), <i>Bison</i> (Bison) (0,1), <i>Redunca</i> (Reedbuck) (0,1)       |
| 139           | <i>Bos</i> (Cattle) (99,4), <i>Bubalus</i> (Buffalo) (0,2), <i>Sus</i> (Pig) (0,1), <i>Rupicapra</i> (Goat Antelope) (0,1) and <i>Redunca</i> (Reedbuck) (0,1)                                |
| 14            | <i>Bos</i> (Cattle) (99,0), <i>Sus</i> (Pig) (0,3), <i>Bubalus</i> (Buffalo) (0,3), <i>Rupicapra</i> (Goat Antelope) (0,2), <i>Redunca</i> (Reedbuck) (0,1)                                   |
| 152           | <i>Bos</i> (Cattle) (99,2), <i>Bubalus</i> (Buffalo) (0,3), <i>Rupicapra</i> (Goat Antelope) (0,2), <i>Sus</i> (Pig) (0,1) and <i>Redunca</i> (Reedbuck) (0,1)                                |
| 154           | <i>Bos</i> (Cattle) (99,5), <i>Bubalus</i> (Buffalo) (0,1) and <i>Rupicapra</i> (Goat Antelope) (0,1)                                                                                         |
| 158           | <i>Bos</i> (Cattle) (98,9), <i>Ovis</i> (Sheep) (0,4), <i>Sus</i> (Pig) (0,2), <i>Homo</i> (Human) (0,1), <i>Bubalus</i> (Buffalo) (0,1) and <i>Redunca</i> (Reedbuck) (0,1)                  |
| 162           | <i>Bos</i> (Cattle) (99,1), <i>Bubalus</i> (Buffalo) (0,3), <i>Ovis</i> (Sheep) (0,2), <i>Bison</i> (Bison) (0,1), <i>Rupicapra</i> (Goat Antelope) (0,1) and <i>Redunca</i> (Reedbuck) (0,1) |

|                  |                                                                                                                                                                                                                       |
|------------------|-----------------------------------------------------------------------------------------------------------------------------------------------------------------------------------------------------------------------|
| 163              | <i>Bos</i> (Cattle) (99,1), <i>Bubalus</i> (Buffalo) (0,3), <i>Ovis</i> (Sheep) (0,2), <i>Bison</i> (Bison) (0,1), <i>Rupicapra</i> (Goat Antelope) (0,1) and <i>Redunca</i> (Reedbuck) (0,1)                         |
| 164              | <i>Bos</i> (Cattle) (99,5), <i>Sus</i> (Pig) (0,3), <i>Bubalus</i> (Buffalo) (0,1) and <i>Rupicapra</i> (Goat Antelope) (0,1)                                                                                         |
| 167              | <i>Bos</i> (Cattle) (98,5), <i>Ovis</i> (Sheep) (0,6), <i>Bubalus</i> (Buffalo) (0,3), <i>Rupicapra</i> (Goat Antelope) (0,3) and <i>Redunca</i> (Reedbuck) (0,1)                                                     |
| 17 <sup>©</sup>  | <i>Bos</i> (Cattle) (97,0), <i>Ovis</i> (Sheep) (2,0), <i>Bubalus</i> (Buffalo) (0,3), <i>Rupicapra</i> (Goat Antelope) (0,3), <i>Sus</i> (Pig) (0,1), <i>Bison</i> (Bison) (0,1) and <i>Redunca</i> (Reedbuck) (0,1) |
| 173              | <i>Bos</i> (Cattle) (99,4), <i>Bubalus</i> (Buffalo) (0,3), <i>Rupicapra</i> (Goat Antelope) (0,1) and <i>Redunca</i> (Reedbuck) (0,1)                                                                                |
| 18               | <i>Bos</i> (Cattle) (98,3), <i>Ovis</i> (Sheep) (0,7), <i>Bubalus</i> (Buffalo) (0,3), <i>Sus</i> (Pig) (0,3), <i>Rupicapra</i> (Goat Antelope) (0,3) and <i>Redunca</i> (Reedbuck) (0,1)                             |
| 183 <sup>©</sup> | <i>Bos</i> (Cattle) (93,3), <i>Sus</i> (Pig) (6,1), <i>Bubalus</i> (Buffalo) (0,2), <i>Rupicapra</i> (Goat Antelope) (0,2) and <i>Redunca</i> (Reedbuck) (0,1)                                                        |
| 99               | <i>Bos</i> (Cattle) (99,1), <i>Homo</i> (Human) (0,5) and <i>Struthio</i> (Ostrich) (0,2)                                                                                                                             |

**Table S8.** Percentage average fold of DNA from retail patties for which the meat types were not indicated on product labels (N=15).

| Sample Number   | Genus (% Of Average Fold)                                                                                                                                                             |
|-----------------|---------------------------------------------------------------------------------------------------------------------------------------------------------------------------------------|
| 5               | <i>Bos</i> (Cattle) (99,3), <i>Sus</i> (Pig) (0,2), <i>Bubalus</i> (Buffalo) (0,2), <i>Rupicapra</i> (Goat Antelope) (0,2) and <i>Redunca</i> (Reedbuck) (0,1)                        |
| 12              | <i>Bos</i> (Cattle) (99,4), <i>Bubalus</i> (Buffalo) (0,2), <i>Sus</i> (Pig) (0,1), <i>Ovis</i> (Sheep) (0,1) and <i>Redunca</i> (Reedbuck) (0,1)                                     |
| 15              | <i>Bos</i> (Cattle) (99,1), <i>Ovis</i> (Sheep), (0,4), <i>Bubalus</i> (Buffalo) (0,2), <i>Rupicapra</i> (Goat Antelope) (0,1) and <i>Redunca</i> (Reedbuck) (0,1)                    |
| 2               | <i>Bos</i> (Cattle) (99,7), <i>Bubalus</i> (Buffalo) (0,1) <i>Rupicapra</i> (Goat Antelope) (0,1) and, <i>Redunca</i> (Reedbuck) (0,1)                                                |
| 22              | <i>Bos</i> (Cattle) (99,7), <i>Bubalus</i> (Buffalo) (0,1) and <i>Rupicapra</i> (Goat Antelope) (0,1)                                                                                 |
| 32              | <i>Bos</i> (Cattle) (99,6), <i>Bubalus</i> (Buffalo) (0,2), <i>Rupicapra</i> (0,1) and <i>Redunca</i> (Reedbuck) (0,1)                                                                |
| 44              | <i>Bos</i> (Cattle) (99,5), <i>Bubalus</i> (Buffalo) (0,2) <i>Rupicapra</i> (Goat Antelope) (0, 2) and <i>Sus</i> (Pig) (0,1)                                                         |
| 46              | <i>Bos</i> (Cattle) (99,1), <i>Bubalus</i> (Buffalo) (0,3), <i>Rupicapra</i> (Goat Antelope) (0,3), <i>Sus</i> (Pig) (0,1) and <i>Redunca</i> (Reedbuck) (0,1).                       |
| 47              | <i>Bos</i> (Cattle) (99,7) and <i>Bubalus</i> (Buffalo) (0,1)                                                                                                                         |
| 48 <sup>©</sup> | <i>Bos</i> (Cattle) (91,8), <i>Sus</i> (Pig) (7,7), <i>Bubalus</i> (Buffalo) (0,1) <i>Bison</i> (Bison) (0,1), <i>Rupicapra</i> (Goat Antelope) (0,1) <i>Redunca</i> (Reedbuck) (0,1) |
| 57              | <i>Bos</i> (Cattle) (98,9), <i>Bubalus</i> (Buffalo) (0,4), <i>Rupicapra</i> (Goat Antelope) (0,4) and <i>Redunca</i> (Reedbuck) (0,1)                                                |
| 7               | <i>Bos</i> (Cattle) (99,7), <i>Bubalus</i> (Buffalo) (0,1) and <i>Rupicapra</i> (Goat Antelope) (0,1)                                                                                 |
| 73              | <i>Bos</i> (Cattle) (99,2), <i>Bubalus</i> (Buffalo) (0,2) <i>Rupicapra</i> (Goat Antelope), (0,2) and <i>Redunca</i> (Reedbuck) (0,1)                                                |
| 8               | <i>Bos</i> (Cattle) (99,6), <i>Sus</i> (Pig) (0,1) <i>Bubalus</i> (Buffalo) (0,1) and <i>Rupicapra</i> (Goat Antelope) (0,1)                                                          |
| 84 <sup>©</sup> | <i>Sus</i> (Pig) (59,6), <i>Bos</i> (Cattle) (40,0), <i>Bubalus</i> (Buffalo) (0,1), <i>Connochaetes</i> (Wildebeest) (0,1) and <i>Rupicapra</i> (Goat Antelope) (0,1)                |

**Table S9.** Percentage average folds of DNA from retail meat products labelled as beef patty (n=18)

| Sample Number    | Genus (% Of Average Fold)                                                                                                                                         |
|------------------|-------------------------------------------------------------------------------------------------------------------------------------------------------------------|
| 102              | <i>Bos</i> (Cattle) (99,4), <i>Bubalus</i> (Buffalo) (0,2), <i>Ovis</i> (Sheep) (0,1), <i>Rupicapra</i> (Goat Antelope) (0,1) and <i>Redunca</i> (Reedbuck) (0,1) |
| 113 <sup>©</sup> | <i>Bos</i> (Cattle) (93,4), <i>Ovis</i> (Sheep) (5,6), <i>Sus</i> (Pig) (0,1), <i>Bubalus</i> (Buffalo) (0,1) and <i>Rupicapra</i> (Goat Antelope) (0,1)          |

|                  |                                                                                                                                                                                               |
|------------------|-----------------------------------------------------------------------------------------------------------------------------------------------------------------------------------------------|
| 115              | <i>Bos</i> (Cattle) (99,1), <i>Bubalus</i> (Buffalo) (0,3), <i>Ovis</i> (Sheep) (0,2), <i>Bison</i> (Bison) (0,1), <i>Rupicapra</i> (Goat Antelope) (0,1) and <i>Redunca</i> (Reedbuck) (0,1) |
| 112 <sup>®</sup> | <i>Bos</i> (Cattle) (81,7), <i>Ovis</i> (Sheep) (17,7) <i>Rupicapra</i> (Goat Antelope) (0,2), <i>Bison</i> (Bison) (0,1) and <i>Bubalus</i> (Buffalo) (0,1)                                  |
| 12               | <i>Bos</i> (Cattle) (98,2), <i>Ovis</i> (Sheep) (1,2), <i>Rupicapra</i> (Goat Antelope) (0,2), <i>Bubalus</i> (Buffalo) (0,1) and <i>Bison</i> (Bison) (0,1)                                  |
| 122 <sup>®</sup> | <i>Bos</i> (Cattle) (64,5), <i>Ovis</i> (Sheep) (34,3), <i>Rupicapra</i> (Goat Antelope) (0,7) and <i>Bubalus</i> (Buffalo) (0,1)                                                             |
| 124              | <i>Bos</i> (Cattle) (99,2), <i>Bubalus</i> (Buffalo) (0,3), <i>Rupicapra</i> (Goat Antelope) (0,2) and <i>Redunca</i> (Reedbuck) (0,1)                                                        |
| 125              | <i>Bos</i> (Cattle) (98,7), <i>Ovis</i> (Sheep) (0,9), <i>Bubalus</i> (Buffalo) (0,2), <i>Rupicapra</i> (Goat Antelope) (0,1) and <i>Redunca</i> (Reedbuck) (0,1)                             |
| 13               | <i>Bos</i> (Cattle) (99,5), <i>Sus</i> (Pig) (0,2) and <i>Bubalus</i> (Buffalo) (0,1)                                                                                                         |
| 136 <sup>®</sup> | <i>Bos</i> (Cattle) (94,9), <i>Sus</i> (Pig) (4,4), <i>Bubalus</i> (Buffalo) (0,2) and <i>Redunca</i> (Reedbuck) (0,1)                                                                        |
| 14               | <i>Bos</i> (Cattle) (99,1), <i>Sus</i> (Pig) (0,2), <i>Bubalus</i> (Buffalo) (0,2), <i>Rupicapra</i> (Goat Antelope) (0,1) and <i>Redunca</i> (Reedbuck) (0,1)                                |
| 146              | <i>Bos</i> (Cattle) (99,5), <i>Sus</i> (Pig) (0,1), <i>Homo</i> (Huma) (0,1) and <i>Ovis</i> (Sheep) (0,1)                                                                                    |
| 169              | <i>Bos</i> (Cattle) (99,3), <i>Bubalus</i> (Buffalo) (0,3), <i>Rupicapra</i> (Goat Antelope) (0,1) and <i>Redunca</i> (Reedbuck) (0,1)                                                        |
| 172              | <i>Bos</i> (Cattle) (99,0), <i>Bubalus</i> (Buffalo) (0,4), <i>Rupicapra</i> (Goat Antelope) (0,2), <i>Redunca</i> (Reedbuck) (0,2) and <i>Bison</i> (Bison) (0,1)                            |
| 179 <sup>®</sup> | <i>Bos</i> (Cattle) (93,4), <i>Ovis</i> (Sheep) (6,2), <i>Bubalus</i> (Buffalo) (0,1) <i>Rupicapra</i> (Goat Antelope) (0,1)                                                                  |
| 18               | <i>Bos</i> (Cattle) (99,3), <i>Bubalus</i> (Buffalo) (0,3), <i>Rupicapra</i> (Goat Antelope) (0,2) and <i>Redunca</i> (Reedbuck) (0,1)                                                        |
| 182              | <i>Bos</i> (Cattle) (98,7), <i>Homo</i> (Human) (0,6), <i>Mus</i> (Rat) (0,3), <i>Sus</i> (Pig) (0,1), <i>Bubalus</i> (Buffalo) (0,1) and <i>Redunca</i> (Reedbuck) (0,1)                     |
| 185              | <i>Bos</i> (Cattle) (98,7), <i>Bubalus</i> (Buffalo) (0,4), <i>Rupicapra</i> (Goat Antelope) (0,4), <i>Redunca</i> (Reedbuck) (0,2) and <i>Ovis</i> (Sheep) (0,1)                             |

**Table S10.** Percentage average folds of DNA from retail sausages for which the meat types were not indicated on product labels (n=21).

| Sample Number    | Genus (% Of Average Fold)                                                                                                                                                                     |
|------------------|-----------------------------------------------------------------------------------------------------------------------------------------------------------------------------------------------|
| 15 <sup>®</sup>  | <i>Bos</i> (Cattle) (37,1) <i>Sus</i> (Pig) (38,5), <i>Ovis</i> (Sheep) (23,7) and <i>Rupicapra</i> (Goat Antelope) (0,2)                                                                     |
| 159 <sup>®</sup> | <i>Ovis</i> (Sheep) (91,4), <i>Bos</i> (Cattle) (7,0), <i>Bison</i> (Bison) (0,1), <i>Rupicapra</i> (Goat Antelope) (1,3) and <i>Naemorhedus</i> (Goral) (0,1)                                |
| 16               | <i>Bos</i> (Cattle) (99,5), <i>Bubalus</i> (Buffalo) (0,2), <i>Rupicapra</i> (Goat Antelope) (0,1) and <i>Redunca</i> (Reedbuck) (0,1)                                                        |
| 18               | <i>Bos</i> (Cattle) (99,3), <i>Bubalus</i> (Buffalo) (0,2), <i>Gallus</i> (Chicken) (0,2), <i>Sus</i> (Pig) (0,1), <i>Rupicapra</i> (Goat Antelope) (0,1) and <i>Redunca</i> (Reedbuck) (0,1) |
| 26 <sup>®</sup>  | <i>Bos</i> (Cattle) (91,0), <i>Ovis</i> (Sheep) (5,2), <i>Sus</i> (Pig) (3,0), <i>Bubalus</i> (Buffalo) (0,3), <i>Rupicapra</i> (Goat Antelope) (0,2) and <i>Redunca</i> (Reedbuck) (0,1)     |
| 27               | <i>Bos</i> (Cattle) (99,5), <i>Sus</i> (Pig) (0,1), <i>Bubalus</i> (Buffalo) (0,1) and <i>Rupicapra</i> (Goat Antelope) (0,1)                                                                 |
| 29               | <i>Bos</i> (Cattle) (98,8), <i>Ovis</i> (Sheep) (0,6), <i>Bubalus</i> (Buffalo) (0,2), <i>Sus</i> (Pig) (0,1), <i>Rupicapra</i> (Goat Antelope) (0,1) and <i>Redunca</i> (Reedbuck) (0,1)     |
| 38               | <i>Bos</i> (Cattle) (99,0), <i>Bubalus</i> (Buffalo) (0,3), <i>Rupicapra</i> (Goat Antelope) (0,2), <i>Ovis</i> (Sheep) (0,1) and <i>Redunca</i> (Reedbuck) (0,1)                             |
| 4 <sup>®</sup>   | <i>Sus</i> (Pig) (97,4) and <i>Bos</i> (Cattle) (2,7)                                                                                                                                         |
| 42               | <i>Bos</i> (Cattle) (99,3), <i>Sus</i> (Pig) (0,3), <i>Bubalus</i> (Buffalo) (0,2), <i>Rupicapra</i> (Goat Antelope) (0,1) and <i>Redunca</i> (Reedbuck) (0,1)                                |
| 43               | <i>Bos</i> (Cattle) (99,5), <i>Bubalus</i> (Buffalo) (0,2), <i>Rupicapra</i> (Goat Antelope) (0,1), <i>Redunca</i> (Reedbuck) (0,1) and <i>Hemitragus</i> (Tahr) (0,1)                        |

|                 |                                                                                                                                                                                                                              |
|-----------------|------------------------------------------------------------------------------------------------------------------------------------------------------------------------------------------------------------------------------|
| 5 <sup>°</sup>  | <i>Sus</i> (Pig) (94,8) and <i>Bos</i> (Cattle) (5,2)                                                                                                                                                                        |
| 68 <sup>°</sup> | <i>Bos</i> (Cattle) (97,9), <i>Bubalus</i> (Buffalo) (0,8), <i>Rupicapra</i> (Goat Antelope) (0,6), <i>Redunca</i> (Reedbuck) (0,3) and <i>Bison</i> (Bison) (0,2)                                                           |
| 7               | <i>Bos</i> (Cattle) (99,6), <i>Bubalus</i> (Buffalo) (0,2), <i>Ovis</i> (Sheep) (0,1), <i>Bison</i> (Bison) (0,1), <i>Rupicapra</i> (Goat Antelope) (0,1) and <i>Redunca</i> (Reedbuck) (0,1)                                |
| 72              | <i>Bos</i> (Cattle) (98,9), <i>Bubalus</i> (Buffalo) (0,5), <i>Rupicapra</i> (Goat Antelope) (0,3) and <i>Redunca</i> (Reedbuck) (0,2)                                                                                       |
| 75              | <i>Bos</i> (Cattle) (99,2), <i>Bubalus</i> (Buffalo) (0,3), <i>Sus</i> (Pig) (0,2), <i>Rupicapra</i> (Goat Antelope) (0,2) and <i>Redunca</i> (Reedbuck) (0,1)                                                               |
| 79 <sup>°</sup> | <i>Bos</i> (Cattle) (95,9), <i>Ovis</i> (Sheep) (3,6), <i>Rupicapra</i> (Goat Antelope) (0,2), <i>Bubalus</i> (Buffalo) (0,1), <i>Bison</i> (Bison) (0,1) and <i>Redunca</i> (Reedbuck) (0,1)                                |
| 82              | <i>Bos</i> (Cattle) (99,5), <i>Sus</i> (Pig) (0,1), <i>Ovis</i> (Sheep) (0,1), <i>Bubalus</i> (Buffalo) (0,1) and <i>Rupicapra</i> (Goat Antelope) (0,1)                                                                     |
| 83 <sup>°</sup> | <i>Bos</i> (Cattle) (74,7), <i>Sus</i> (Pig) (24,7), <i>Ovis</i> (Sheep) (0,2), <i>Bubalus</i> (Buffalo) (0,2), <i>Rupicapra</i> (Goat Antelope) (0,1) and <i>Redunca</i> (Reedbuck) (0,1)                                   |
| 85              | <i>Bos</i> (Cattle) (97,5), <i>Equus</i> (Horse/Donkey) (0,9), <i>Sus</i> (Pig) (0,8), <i>Ovis</i> (Sheep) (0,2), <i>Bubalus</i> (Buffalo) (0,2), <i>Rupicapra</i> (Goat Antelope) (0,2) and <i>Redunca</i> (Reedbuck) (0,1) |
| 87              | <i>Bos</i> (Cattle) (99,3), <i>Rupicapra</i> (Goat Antelope) (0,2), <i>Sus</i> (Pig) (0,1), <i>Bubalus</i> (Buffalo) (0,1) and <i>Redunca</i> (Reedbuck) (0,1)                                                               |

**Table S11.** Percentage average folds of DNA from retail meat products labelled as beef sausage (N=21).

| Sample Number    | Genus (% Of Average Fold)                                                                                                                                                                  |
|------------------|--------------------------------------------------------------------------------------------------------------------------------------------------------------------------------------------|
| S                | <i>Bos</i> (Cattle) (98,7), <i>Ovis</i> (Sheep) (0,5), <i>Sus</i> (Pig) (0,4) and <i>Homo</i> (Human) (0,1)                                                                                |
| 103              | <i>Bos</i> (Cattle) (99,2), <i>Sus</i> (Pig) (0,2), <i>Bubalus</i> (Buffalo) (0,2), <i>Rupicapra</i> (Goat Antelope) (0,2), <i>Bison</i> (Bison) (0,1) and <i>Redunca</i> (Reedbuck) (0,1) |
| 104 <sup>°</sup> | <i>Bos</i> (Cattle) (63,4), <i>Sus</i> (Pig) (36,1), <i>Ovis</i> (Sheep) (0,1), <i>Bubalus</i> (Buffalo) (0,1) and <i>Rupicapra</i> (Goat Antelope) (0,1)                                  |
| 114              | <i>Bos</i> (Cattle) (98,4), <i>Bubalus</i> (Buffalo) (0,6), <i>Rupicapra</i> (Goat Antelope) (0,6), <i>Redunca</i> (Reedbuck) (0,2) and <i>Bison</i> (Bison) (0,1)                         |
| 126 <sup>°</sup> | <i>Bos</i> (Cattle) (78,1), <i>Ovis</i> (Sheep) (20,8) and <i>Capra</i> (Goat) (1,0)                                                                                                       |
| 127 <sup>°</sup> | <i>Bos</i> (Cattle) (69,2), <i>Sus</i> (Pig) (30,4), <i>Bubalus</i> (Buffalo) (0,1) and <i>Rupicapra</i> (Goat Antelope) (0,1)                                                             |
| 129              | <i>Bos</i> (Cattle) (98,8), <i>Ovis</i> (Sheep) (0,9), <i>Sus</i> (Pig) (0,1), <i>Bubalus</i> (Buffalo) (0,1) and <i>Rupicapra</i> (Goat Antelope) (0,1)                                   |
| 134 <sup>°</sup> | <i>Bos</i> (Cattle) (67,5), <i>Ovis</i> (Sheep) (17,7), <i>Sus</i> (Pig) (14,3), <i>Rupicapra</i> (Goat Antelope) (0,3) and <i>Bubalus</i> (Buffalo) (0,1)                                 |
| 135 <sup>°</sup> | <i>Bos</i> (Cattle) (38,8), <i>Sus</i> (Pig) (60,1), <i>Ovis</i> (Sheep) (0,8), <i>Homo</i> (Human) (0,2) and <i>Mus</i> (Rat) (0,2)                                                       |
| 143 <sup>°</sup> | <i>Bos</i> (Cattle) (93,6), <i>Ovis</i> (Sheep) (5,6), <i>Bubalus</i> (Buffalo) (0,2), <i>Rupicapra</i> (Goat Antelope) (0,2) and <i>Redunca</i> (Reedbuck) (0,1)                          |
| 144 <sup>°</sup> | <i>Bos</i> (Cattle) (85,7), <i>Ovis</i> (Sheep) (13,6), <i>Bubalus</i> (Buffalo) (0,2), <i>Rupicapra</i> (Goat Antelope) (0,2) and <i>Redunca</i> (Reedbuck) (0,1)                         |
| 145 <sup>°</sup> | <i>Bos</i> (Cattle) (94,4), <i>Sus</i> (Pig) (3,7), <i>Ovis</i> (Sheep) (0,9), <i>Bubalus</i> (Buffalo) (0,3), <i>Rupicapra</i> (Goat Antelope) (0,3) and <i>Redunca</i> (Reedbuck) (0,1)  |
| 15 <sup>°</sup>  | <i>Bos</i> (Cattle) (18,1), <i>Sus</i> (Pig) (78,1), <i>Ovis</i> (Sheep) (3,5) and <i>Rupicapra</i> (Goat Antelope) (0,2)                                                                  |
| 155 <sup>°</sup> | <i>Bos</i> (Cattle) (85,7), <i>Sus</i> (Pig) (9,9), <i>Ovis</i> (Sheep) (4,0), <i>Bubalus</i> (Buffalo) (0,1) and <i>Rupicapra</i> (Goat Antelope) (0,1)                                   |
| 156 <sup>°</sup> | <i>Bos</i> (Cattle) (79,0), <i>Sus</i> (Pig) (20,5), <i>Ovis</i> (Sheep) (0,1), <i>Bubalus</i> (Buffalo) (0,1), <i>Rupicapra</i> (Goat Antelope) (0,1) and <i>Redunca</i> (Reedbuck) (0,1) |
| 174              | <i>Bos</i> (Cattle) (99,5), <i>Ovis</i> (Sheep) (0,1), <i>Bubalus</i> (Buffalo) (0,1), <i>Rupicapra</i> (Goat Antelope) (0,1) and <i>Redunca</i> (Reedbuck) (0,1)                          |
| 178              | <i>Bos</i> (Cattle) (99,7) and <i>Bubalus</i> (Buffalo) (0,1)                                                                                                                              |
| 184 <sup>°</sup> | <i>Bos</i> (Cattle) (68,7), <i>Ovis</i> (Sheep) (27,9) and <i>Sus</i> (Pig) (3,2)                                                                                                          |



|                  |                                                                                                                                                                    |
|------------------|--------------------------------------------------------------------------------------------------------------------------------------------------------------------|
| 186              | <i>Bos</i> (Cattle) (88,2), <i>Ovis</i> (Sheep) (11,0), <i>Bubalus</i> (Buffalo) (0,3), <i>Rupicapra</i> (Goat Antelope) (0,3) and <i>Redunca</i> (Reedbuck) (0,1) |
| 188 <sup>©</sup> | <i>Bos</i> (Cattle) ( <b>64,2</b> ), <i>Sus</i> (Pig) (35,3), <i>Bubalus</i> (Buffalo) (0,2) and <i>Rupicapra</i> (Goat Antelope) (0,1)                            |
| 189 <sup>©</sup> | <i>Bos</i> (Cattle) ( <b>68,8</b> ), <i>Sus</i> (Pig) (30,1), <i>Ovis</i> (Sheep) (0,8), <i>Bubalus</i> (Buffalo) (0,1) and <i>Rupicapra</i> (Goat Antelope) (0,1) |
